# Supplementary material for: Endoplasmic reticulum aminopeptidase-1 polymorphism increases the risk of rheumatoid arthritis
Source: publisher site journal article supplement (doi:10.1515/tjb-2022-0007), 2022-03-23
Supplement: Supplementary file 1 [file j_tjb-2022-0007_suppl_002.docx]

**Supplemental Table 1:** Primer and probe nucleotide sequences for polymorphic regions.

| **SNP Numbers *** | **Forward Primers** | **Reverse Primers** | **Extension Probe** |
| --- | --- | --- | --- |
| **rs26653** | ACGTTGGATGGGAGCCAGCAGTGCAATTTG | ACGTTGGATGAGAGAGGCTATCGGAAGAAC | TCCTGGAACACCCCC |
| **rs27044** | ACGTTGGATGCTGATAGTTGTGCACACAGG | ACGTTGGATGTAAGCAGACATGGACAGACG | GGCGAGGAGTAGTAGTT |
| **rs27582** | ACGTTGGATGTATTAGGAAGATCAGGCACC | ACGTTGGATGTCTGCCATCTCGCTAAATC | CTCGCTAAATCATCAGTCT |
| **rs28096** | ACGTTGGATGTGCCACATTAGCCTTTGCAC | ACGTTGGATGGGGAGAAATGCAGGTTTCAA | GGAGCCTTTGCACTGTATAGC |
| **rs30187** | ACGTTGGATGCCCTTCATGTAGTGCTCTTG | ACGTTGGATGACCATGATGAACACTTGGAC | CTTGGACACTGCAGA |

SNP-single nucleotide polymorphism, *Referans *ERAP1* accession code NM_016442.5
